# Supplementary material
Source: MDPI journal article supplement (https://www.mdpi.com/2073-4433/10/1/17)
Supplement: s1 [file s1]

Article

# Qualitative and quantitative investigation of multiple Large Eddy Simulation aspects for pollutant dispersion in street canyons using OpenFOAM

Arsenios E. Chatzimichailidis <sup>1</sup>, Christos D. Argyropoulos <sup>2</sup>, Marc J. Assael <sup>1</sup> and Konstantinos E. Kakosimos <sup>3,\*</sup>

<sup>1</sup> Department of Chemical Engineering, Aristotle University of Thessaloniki, Thessaloniki, Greece

<sup>2</sup> System Reliability & Industrial Safety Lab, Institute of Nuclear & Radiological Sciences & Technology, Energy and Safety, National Centre for Scientific Research “Demokritos”, Athens, Greece

<sup>3</sup> Department of Chemical Engineering and Mary Kay O’Connor Process Safety Center, Texas A&M University at Qatar, Education City, Doha, Qatar

\* Correspondence: k.kakosimos@qatar.tamu.edu; Tel.: +974.442.30678

Received: date; Accepted: date; Published: date

## Supplementary Material:

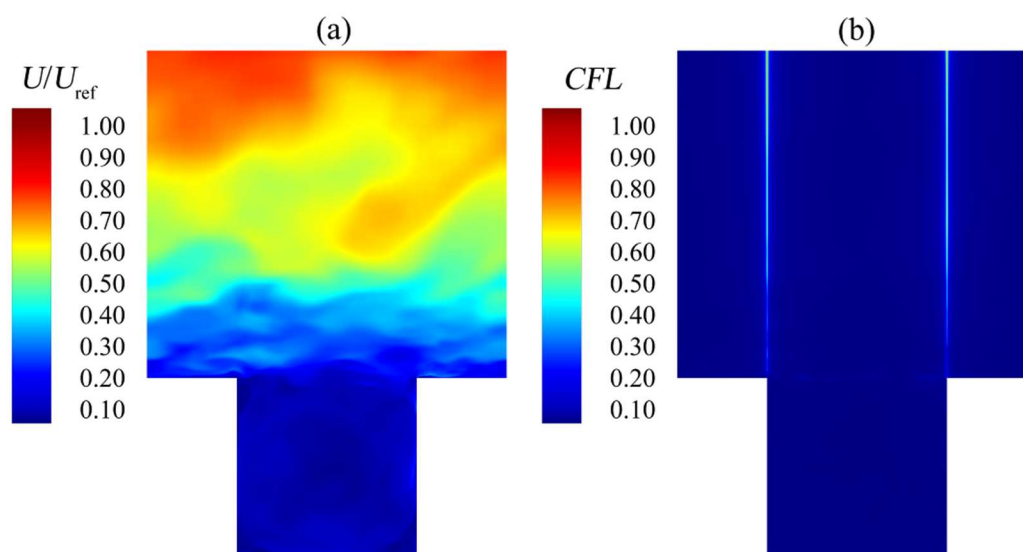

Figure S1: The instantaneous *CFL* number inside the domain at  $t = 1300s$ .

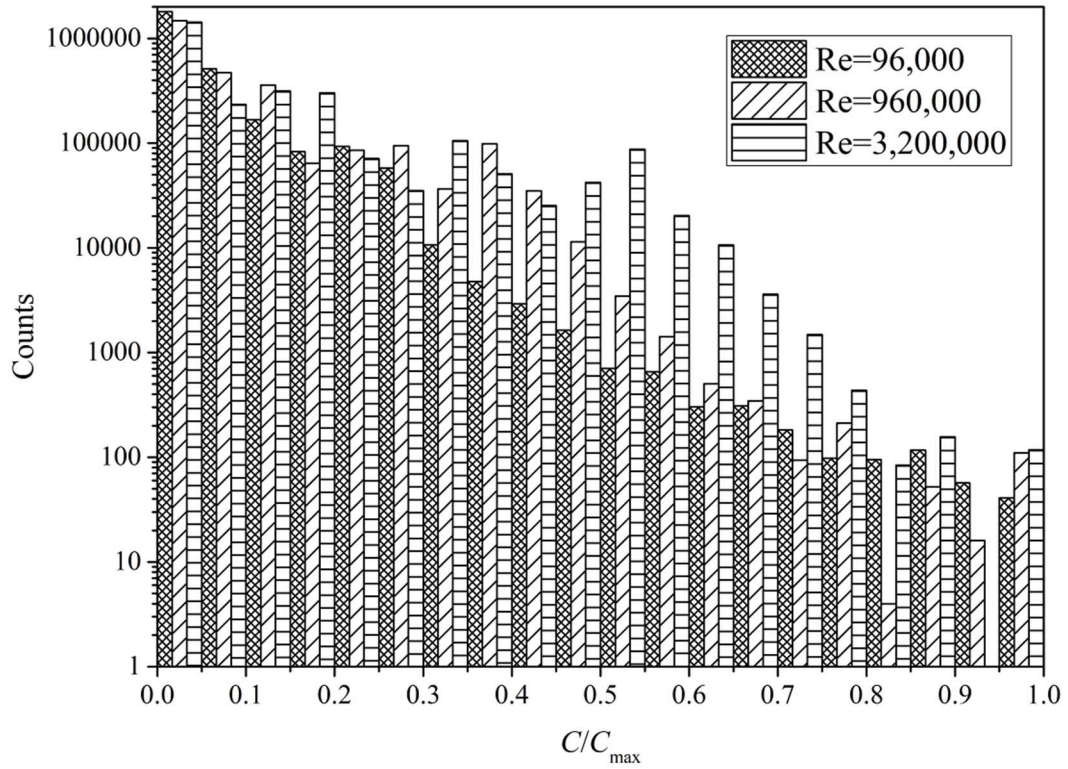

Figure S2: Frequency histogram for the dimensionless concentration inside the domain, for the studied  $Re$  numbers:  $9.6 \cdot 10^4$ ,  $9.6 \cdot 10^5$  and  $3.2 \cdot 10^6$ .

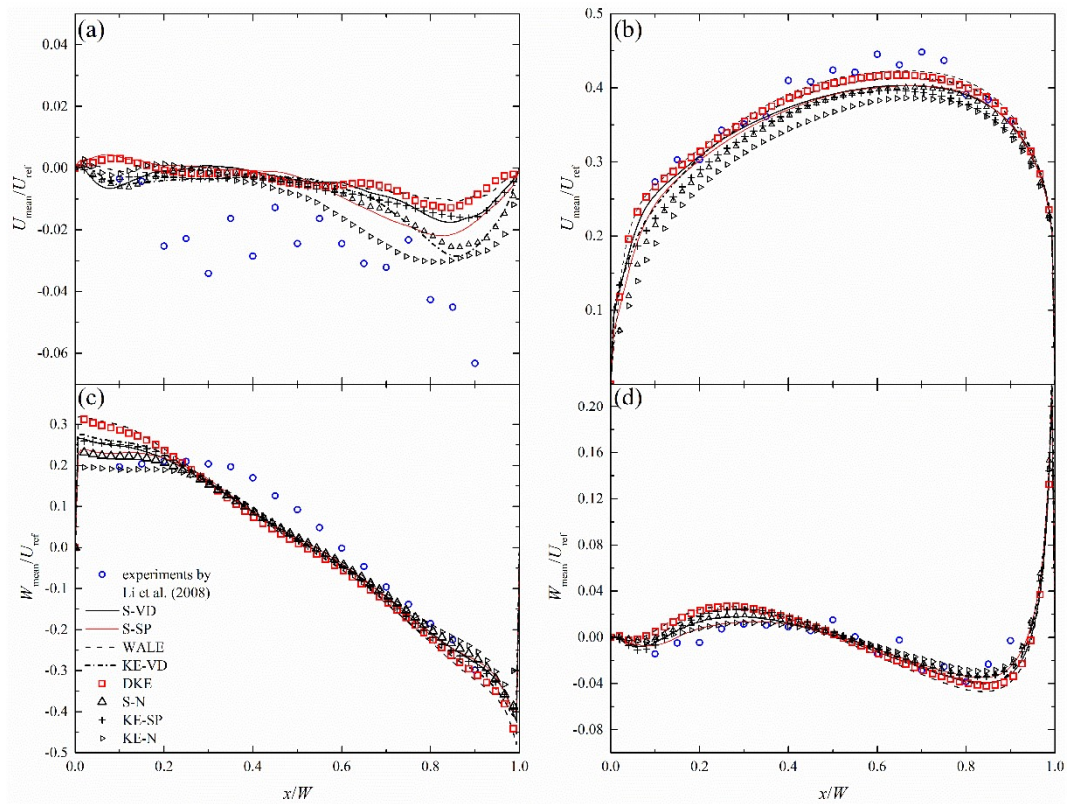

Figure S3: Normalised averages for  $U$ - and  $W$ - velocity components for a unity street canyon at: (a),(c)  $z/H = 0.50$  and (b),(c)  $z/H = 1.00$ .

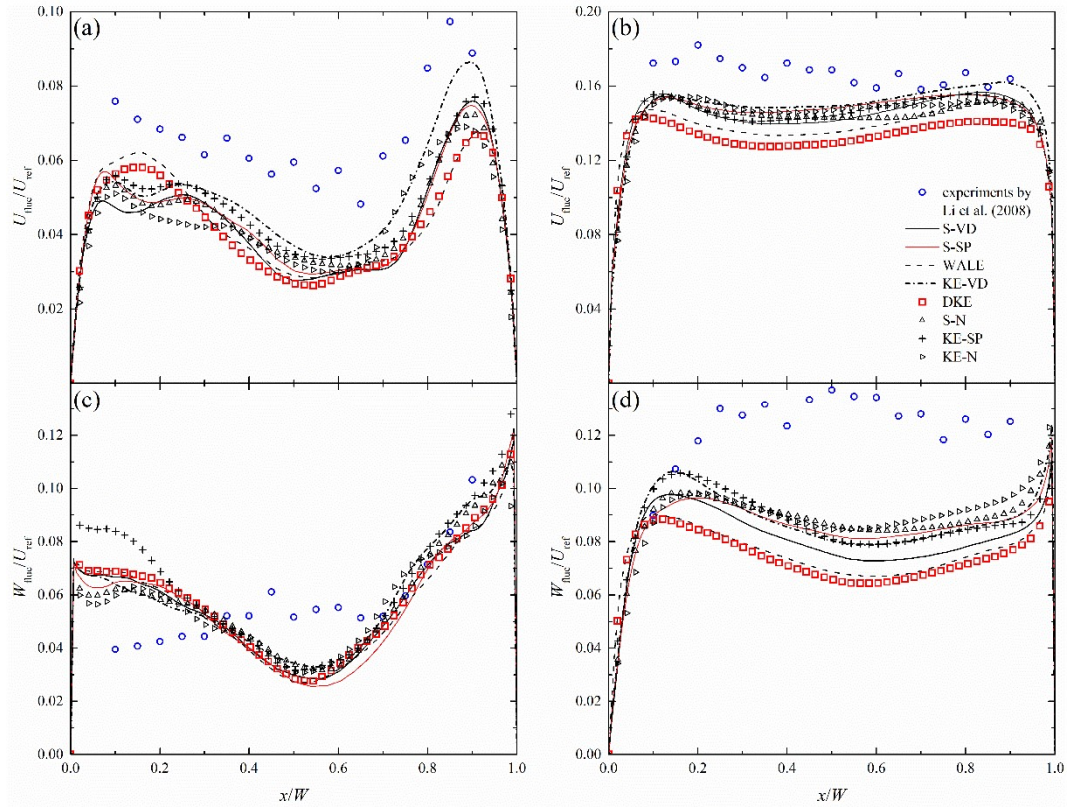

Figure S4: Normalised fluctuations for  $U$ - and  $W$ - velocity components for a unity street canyon at: (a),(c)  $z/H = 0.50$  and (b),(c)  $z/H = 1.00$ .

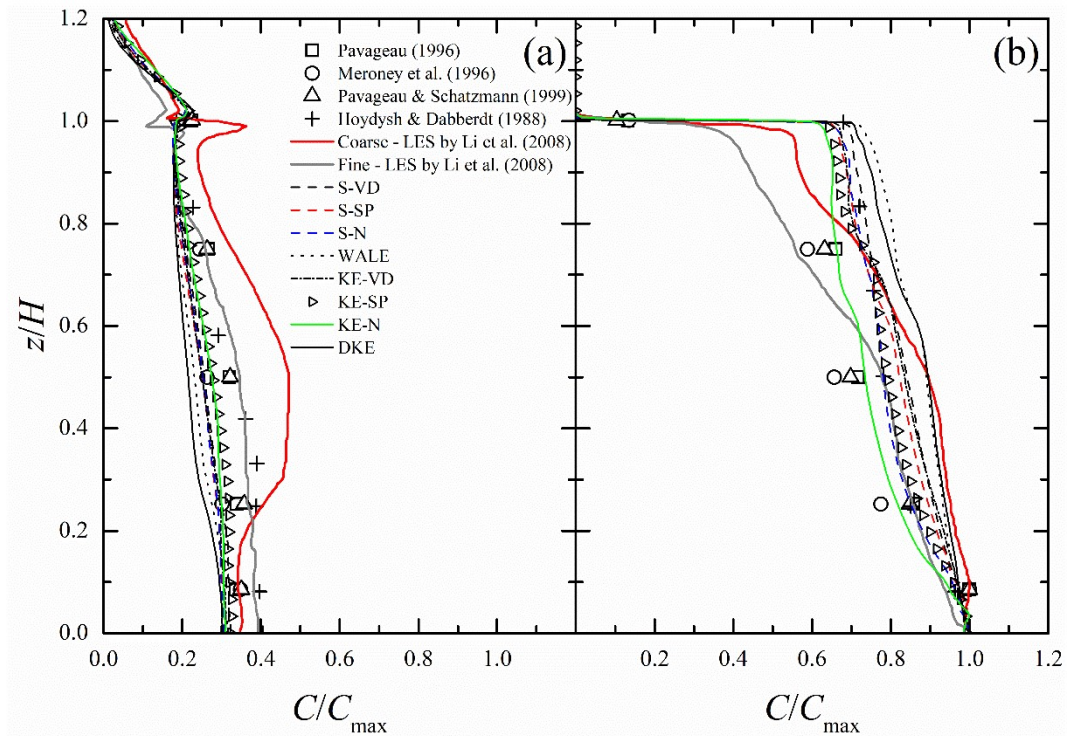

Figure S5: Vertical dimensionless concentration profiles for all the tested SGS models: (a) the downwind and (b) the upwind wall for the unity street canyon.



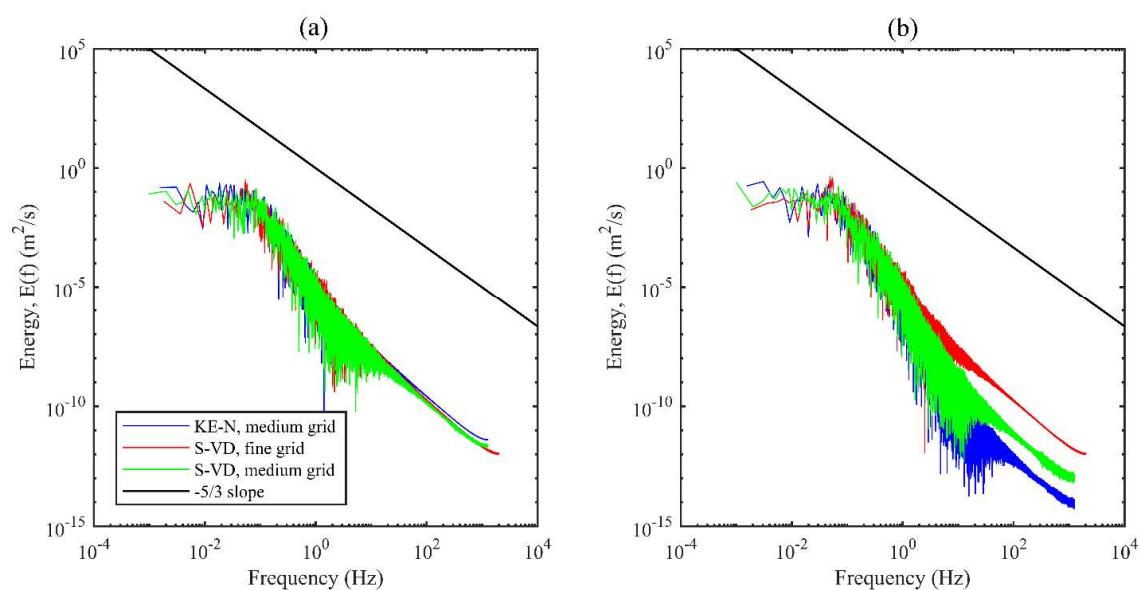

Figure S6: Turbulence energy spectra of the (a)  $U_x$  and (b)  $U_z$  velocity components, for three indicative simulations: KE-N in the medium grid and S-VD in the medium and the fine grid.

[attached separately]

Figure S7: Animation of the first 120 s of pollutant dispersion inside the canyon (with reference velocity is  $5 \text{ m s}^{-1}$ ,  $\text{Re} = 3,200,000$ , k-equation SGS model along with the nutkWallFunction).

OpenFOAM Source files (without the calculated mesh or initial timestep)
